# Supplementary material
Source: PubMed Central journal article supplement (PMC29312)
Supplement: pnas_98_4_1655__2.pdf [file pnas_98_4_1655__2.pdf]

**Table 2. Number of TUNEL-labeled and fragmented nuclei in normally developing human embryos of good morphology**

| Developmental stage | <i>n</i> | Embryo age, days | Mean no nuclei $\pm$ SEM (range) | Total no nuclei* | TUNEL-labeled nuclei | Fragmented nuclei         |
|---------------------|----------|------------------|----------------------------------|------------------|----------------------|---------------------------|
| 4-cell              | 9        | 2–3              | 4.4 $\pm$ 0.4<br>(3 - 7)         | 40               | 0<br>(0%)            | 0<br>(0%)                 |
| 5- to 8-cell        | 17       | 2–4              | 7.7 $\pm$ 0.5<br>(4 - 12)        | 131              | 0<br>(0%)            | 1<br>(0.8%)               |
| 9- to 16-cell       | 11       | 3–4              | 12.7 $\pm$ 1.4<br>(7 - 22)       | 140              | 0<br>(0%)            | 2<br>(1.4%)               |
| Morula              | 12       | 4–5              | 20.0 $\pm$ 3.2<br>(10 - 51)      | 240              | 17<br>(7.1%)         | 11<br>(4.6%)              |
| Blastocyst          | 17       | 4–6              | 42.4 $\pm$ 7.2<br>(10 - 128)     | 721              | 79<br>(11%)          | 49<br>(7.7%) <sup>†</sup> |
| Total               | 66       |                  |                                  |                  |                      |                           |

\*Includes fragmented, mitotic, and TUNEL-labeled nuclei.

<sup>†</sup>The number of fragmented nuclei was not determined for two blastocysts; these have been excluded for calculation of percentage.
